# Supplementary material
Source: Research Square preprint supplement (doi:10.21203/rs.3.rs-9878033/v1)
Supplement: Supplementary file 1 [file f9bb7dd6ecefd7ae24c2c317.docx]

Table 1. Abundance of *Salpa thompsoni* at stations south of the Antarctic Polar Front in the upper 500-3200 m caught using RMT-8 (in brackets, where available, salp abundance in RMT-1 net). B/O = blastozooid to oozooid ratio

Station Latitude Longitude Date Time of Depth Volume Salp B/O ratio

sampling sampled filtered density

(m) (m3) (ind.m-2)

30-1 -51.064 6.218 2005-11-25 2:22 0-3200 160507 0.62 29.9

30-2 -51.180 6.378 2005-11-25 6:35 0-1000 77784 8.74 41.4

34-1 -55.038 2.982 2005-11-26 12:25 0-2000 231870 0.33 3.1

34-2 -54.911 2.825 2005-11-26 17:44 0-1000 78228 1.73 6.2

62-3 -59.980 3.029 2005-12-13 10:51 0-3000 155000 0

62-4 -59.968 2.538 2005-12-13 18:25 0-1000 75680 0

93-5 -64.985 -2.987 2005-12-23 8:34 0-3200 163600 0

93-6 -64.805 -2.827 2005-12-23 15:23 0-1000 76500 0

127-1 -69.460 -8.958 2006-01-02 11:34 0-1000 72300 0

127-2 -69.408 -9.220 2006-01-02 14:28 0-2500 190500 0

506-8 -61.975 -0.026 2006-07-23 11:40 0-2000 240283 0.01 only oozooids

529-7 -60.022 -0.016 2006-08-10 15:18 0-3000 240382 0.01 only oozooids

532-9 -59.905 2.878 2006-08-13 1:34 0-3000 259766 0

39-6 -64.480 2.865 2008-01-03 9:21 1900-1500 28557 0

39-6 -64.480 2.865 2008-01-03 10:10 1500-750 22838 0

39-6 -64.480 2.865 2008-01-03 10:49 750-500 6877 0

39-6 -64.480 2.865 2008-01-03 11:59 0-200 6250 0

62-4 -62.998 0.014 2008-01-21 11:45 0-200 6500 0

62-4 -62.998 0.014 2008-01-21 13:01 2500-2000 23350 0

62-4 -62.998 0.014 2008-01-21 13:40 2000-1000 31101 0

62-4 -62.998 0.014 2008-01-21 14:32 1000-500 14980 0

68-4 -59.997 -0.057 2008-01-23 9:12 0-200 6100 0

68-4 -59.997 -0.057 2008-01-23 10:28 2500-2000 22707 0

68-4 -59.997 -0.057 2008-01-23 11:04 2000-1000 69008 0

68-4 -59.997 -0.057 2008-01-23 12:54 1000-500 38449 0

84-2 -52.202 -0.001 2008-01-26 13:13 2000-1500 35572 6.61 0.01

84-2 -52.202 -0.001 2008-01-26 14:10 1500-1000 21294 9.63 0.1

84-2 -52.202 -0.001 2008-01-26 14:44 1000-500 30357 19.08 3.6

84-2 -52.202 -0.001 2008-01-26 16:23 0-200 6720 0

84-15 -53.002 10.077 2012-01-22 14:00 0-1000 98489 68.24 89

137-3 -51.025 -12.167 2012-02-14 18:20 0-1000 106808 6.17 18

140-9 -51.167 -12.800 2012-02-17 3:34 0-1000 103350 2.18 9

174-11 -49.665 -38.378 2012-03-01 21:29 0-1000 113430 2.49 41

535-3 -52.288 -40.529 2013-08-24 17:23 0-500 65468 0.04 (0.18) only oozooids

537-1 -53.571 -39.440 2013-08-26 3:31 0-510 48723 0.29 (0.33) only oozooids

538-1 -53.499 -40.193 2013-08-26 10:13 0-511 20659 0.05 (0) only oozooids

539-1 -53.922 -40.441 2013-08-26 16:03 0-500 58900 0.14 (0) only oozooids

540-1 -54.414 -40.600 2013-08-26 21:50 0-500 39707 0.52 (0.30) 1.1

541-1 -55.000 -40.678 2013-08-27 4:04 0-500 44602 0.19 (0) 0.6

542-1 -55.503 -40.809 2013-08-27 10:03 0-510 53338 0.23 (0.08) 1.7

548-5 -59.999 -42.404 2013-08-29 0:07 0-500 51362 0.23 (0.08) 1.4

554-2 -61.243 -40.906 2013-09-01 2:06 0-500 10547 0.05 (0) only blastozooids

560-4 -60.623 -31.819 2013-09-12 3:03 0-512 13166 0.51 (1.56) 12

565-12 -60.628 -27.194 2013-09-17 5:15 0-500 19850 0.03 (0) only blastozooids

567-1 -60.457 -25.692 2013-09-28 20:20 0-500 11962 2.12 (0) 20.7

570-1 -59.151 -26.236 2013-09-29 18:13 0-607 28105 1.04 (0.35) 23

577-1 -58.392 -26.133 2013-10-02 21:04 0-600 53236 0.16 (0) 7

579-1 -58.443 -25.958 2013-10-02 21:04 0-600 53236 0.91 (0) 39.5

110-2 -61.368 -54.860 2018-04-22 14:32 530-360 6179 2.39 3.4

110-2 -61.368 -54.860 2018-04-22 14:43 360-170 10505 22.74 116

110-2 -61.368 -54.860 2018-04-22 15:00 170-0 13476 56.58 120
